# Supplementary material
Source: publisher figshare collection journal article supplement (https://future-science-group.figshare.com/articles/dataset/_/23507409)
Supplement: Supplementary file 1 [file 1]

**Table S3**

| **Formulations** | **% G0-G1 Phase** | **% G2-M Phase** | **% S Phase** | **%Apoptosis Sub-G0** |
| --- | --- | --- | --- | --- |
| Untreated control | 60.13 | 3.61 | 36.26 | 0.03 |
| BTNB free drug | 58.73 | 9.51 | 31.76 | 0.83 |
| BTNB-PCL-NPs | 62.45 | 9.04 | 28.51** | 1.25 |
| Anti-Erb-BTNB-PCL-NPs | 4.20* | 80.40* | 15.40** | 8.23 # |

*, ** : wrt control cells (p<0.01); # wrt control cells (p<0.001), (n = 3).
